# Supplementary material for: Enzyme-Crosslinked Gelatin Hydrogel with Adipose-Derived Stem Cell Spheroid Facilitating Wound Repair in the Murine Burn Model
Source: Polymers (Basel). 2020 Dec 16;12(12):2997. doi: 10.3390/polym12122997 (PMC7765510; doi:10.3390/polym12122997)
Supplement: Supplementary file 1 [file polymers-12-02997-s001.pdf]

Article

# Enzyme-Crosslinked Gelatin Hydrogel with Adipose-Derived Stem Cell Spheroid Facilitating Wound Repair in the Murine Burn Model

Ting-Yu Lu <sup>1</sup>, Kai-Fu Yu <sup>1</sup>, Shuo-Hsiu Kuo <sup>1</sup>, Nai-Chen Cheng <sup>2,\*</sup>, Er-Yuan Chuang <sup>3,4,\*</sup> and Jiasheng Yu <sup>1,\*</sup>

<sup>1</sup> Department of Chemical Engineering, College of Engineering, National Taiwan University, Taipei 10617, Taiwan; bbb32037@gmail.com (T.-Y.L.); b04504122@gmail.com (K.-F.Y.); b05504084@ntu.edu.tw (S.-H.K.)

<sup>2</sup> Department of Surgery, National Taiwan University Hospital, Taipei 10617, Taiwan

<sup>3</sup> Graduate Institute of Biomedical Materials and Tissue Engineering, International Ph.D. Program in Biomedical Engineering, Taipei Medical University, Taipei 11031, Taiwan

<sup>4</sup> Cell Physiology and Molecular Image Research Center, Wan Fang Hospital, Taipei Medical University, Taipei 11031, Taiwan

\* Correspondence: naichenc@gmail.com (N.-C.C.); eychuang@tmu.edu.com (E.-Y.C.); jiayu@ntu.edu.tw (J.Y.)

Received: 11 November 2020; Accepted: 14 December 2020; Published: date

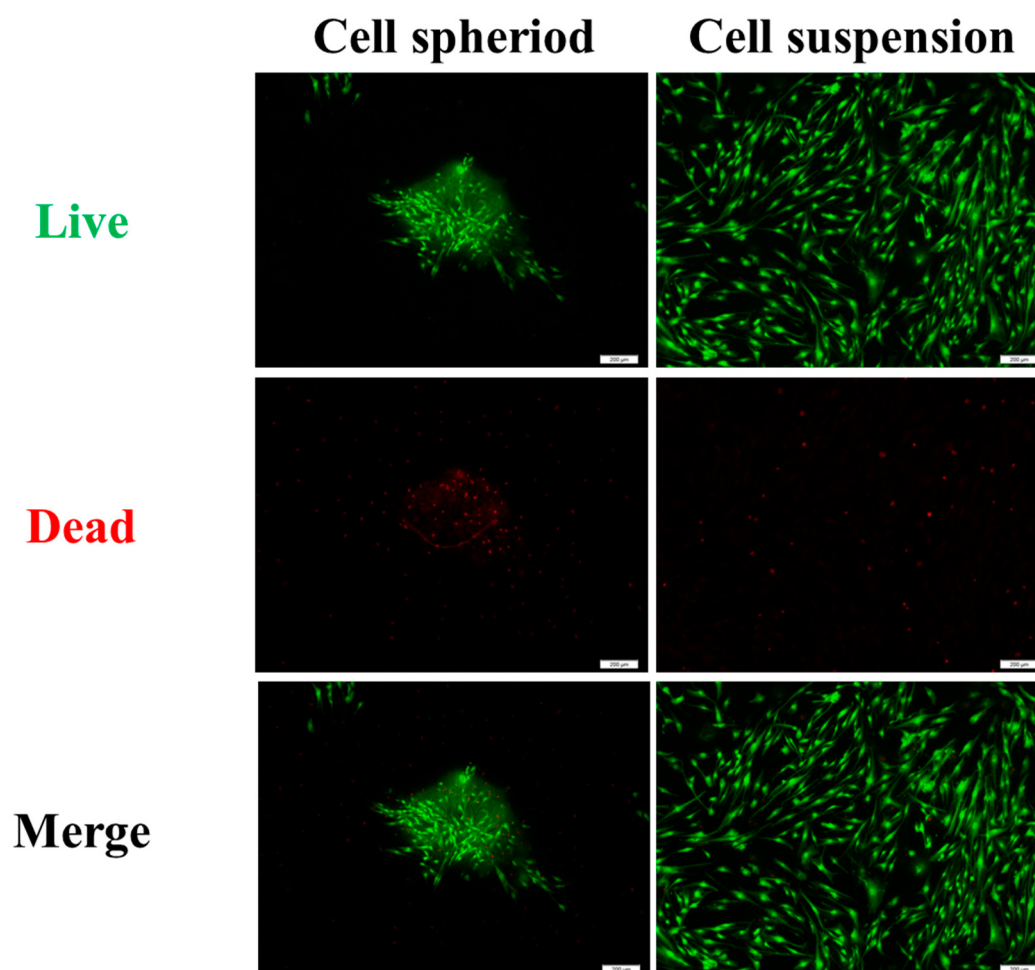

**Figure S1.** 2D fluorescence microscope images of the live/dead assay of the cells and cell spheroids proliferated in the gelatin/mTG hydrogel after culture for 7 days (green: live and red: dead) scale bar = 200  $\mu$ m.

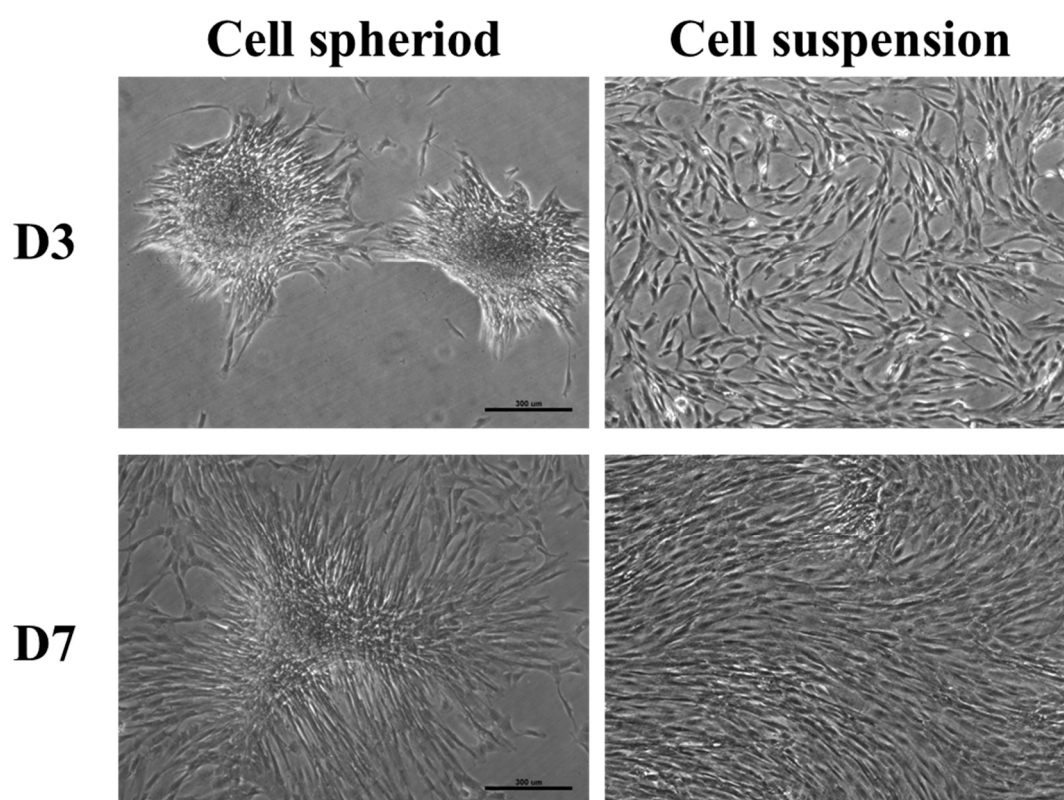

**Figure S2.** Phase contrast microscopy images of the cells and cell spheroids proliferated in the gelatin/mTG hydrogel after culture for 3 and 7 days; scale bar = 200 mm.

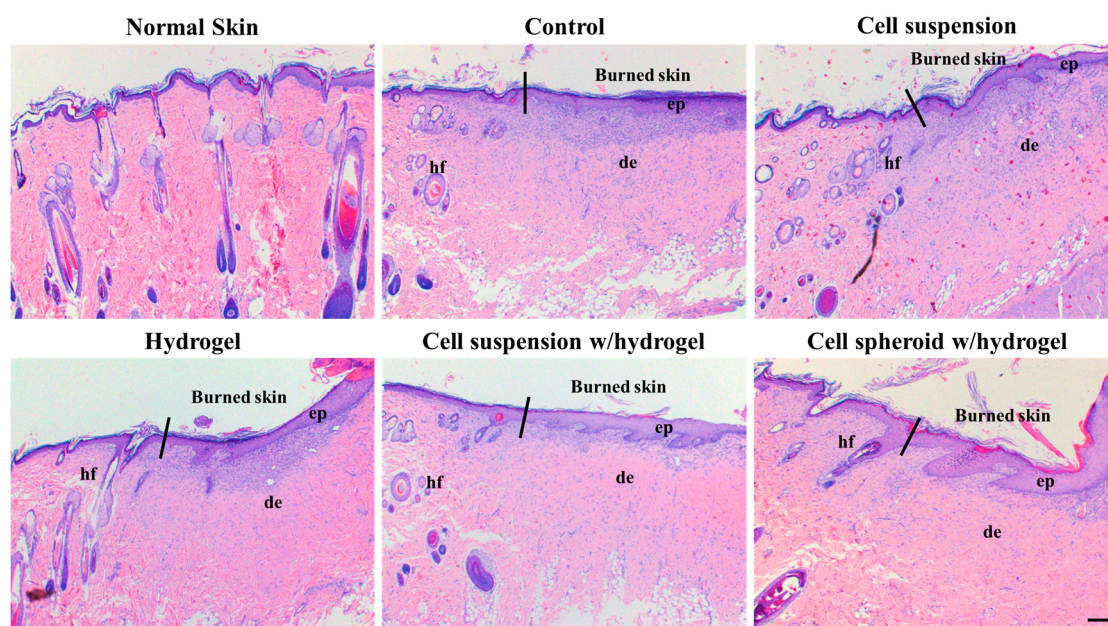

**Figure S3.** Histological examination of burn wounds of different treatment groups at post-burn day 14. Abbreviations: ep, epidermis; de, dermis; hf, hair follicle. Scale bar: 200  $\mu$ m.

**Publisher's Note:** MDPI stays neutral with regard to jurisdictional claims in published maps and institutional affiliations.

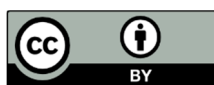

© 2020 by the authors. Submitted for possible open access publication under the terms and conditions of the Creative Commons Attribution (CC BY) license (<http://creativecommons.org/licenses/by/4.0/>).
